# Supplementary material for: Ubiquitin specific protease 19 involved in transcriptional repression of retinoic acid receptor by stabilizing CORO2A
Source: PubMed Central journal article supplement (PMC5085187; doi:10.18632/oncotarget.8976), 2016-04-25
Supplement: oncotarget-07-34759-s001.pdf [file oncotarget-07-34759-s001.pdf]

## SUPPLEMENTARY FIGURES

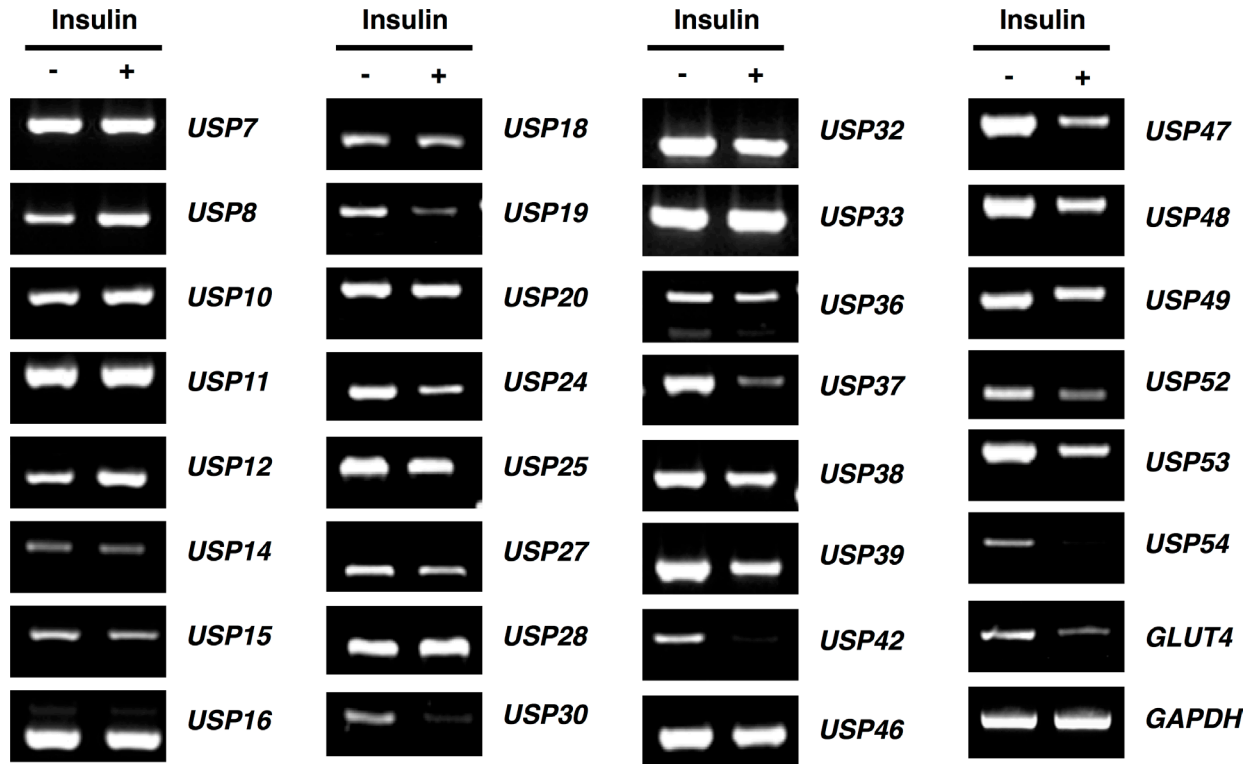

**Supplementary Figure S1: Expression profiling of *Dub* genes with insulin treated 3T3-L1 cells.** 3T3-L1 cells were harvested after insulin treatment, and RT-PCR was performed with cDNA from harvested cells and indicated *Dub* primers.

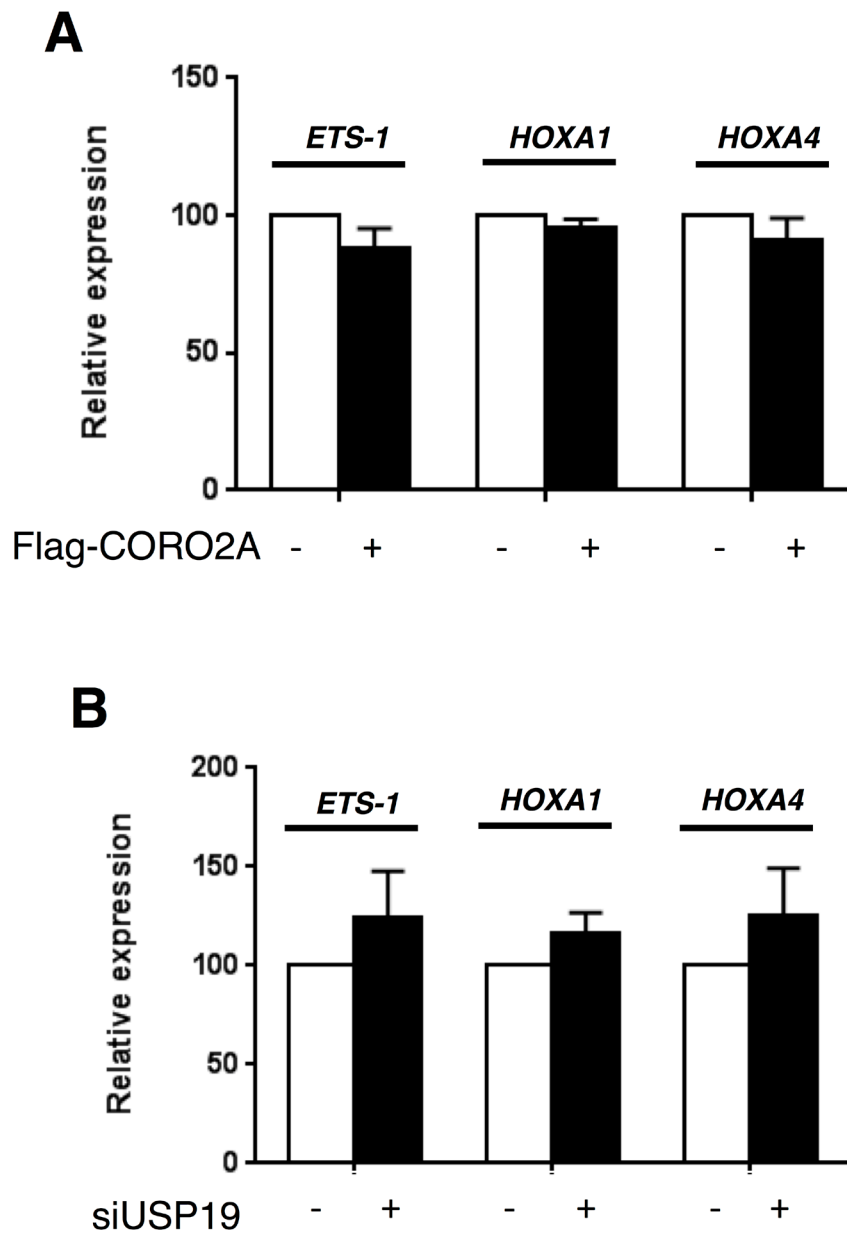

**Supplementary Figure S2: The levels of transcription for *Ets-1*, *HOXA1*, and *HOXA4* in the expression of *CORO2A* and knockdown of *USP19*.** RT-PCR was performed with cDNA which obtained from **A**. Flag-tagged *CORO2A* or **B**. *USP19* siRNA transfected MCF7 cells. *Ets-1*, *Hoxa1*, and *Hoxa4* primers were used for RT-PCR.
